# Supplementary material for: Knowledge and attitude towards pregnancy-related issues of Zika virus infection among general practitioners in Indonesia
Source: Springer Nature journal article supplement (doi:10.1186/s12879-019-4297-4), 2019-08-06
Supplement: MOESM2 [file 12879_2019_4297_MOESM2_ESM.pdf]

## Knowledge on Zika infection

| No | Question                                                                                                                       |
|----|--------------------------------------------------------------------------------------------------------------------------------|
| 1  | A pregnant woman already infected with Zika virus can pass Zika virus to her foetus during pregnancy through placenta          |
| 2  | A mother can pass Zika virus to her child through breastfeeding                                                                |
| 3  | Zika infection during pregnancy can cause foetuses to have a birth defect                                                      |
| 4  | Zika infection during pregnancy can cause foetuses to have a birth defect of the hearth called Ventricular Septal Defect (VSD) |
| 5  | Zika infection during pregnancy can cause foetuses to have a birth defect of the brain called microcephaly                     |

## Attitude towards Zika infection

| No | Question                                                                                                                                                                                             |
|----|------------------------------------------------------------------------------------------------------------------------------------------------------------------------------------------------------|
| 1  | Do you think a pregnant woman with laboratory evidence of Zika virus infection should undergo caesarean section to prevent intra uterine infection?                                                  |
| 2  | Do you think infants born from mothers with possible Zika virus infection during pregnancy should receive a comprehensive physical examination, serological and molecular testing of the Zika virus? |
| 3  | Do you think a pregnant woman with acute Zika virus infection should be treated with antibiotics                                                                                                     |
| 4  | Do you think a pregnant woman with acute Zika virus infection should be treated with antiviral drugs?                                                                                                |
